# Supplementary material for: Ni-H-Beta Catalysts for Ethylene Oligomerization: Impact of Parent Cation on Ni Loading, Speciation, and Siting
Source: MDPI journal article supplement (doi:10.3390/catal12080824), 2022-07-27
Supplement: s1 [file s1]

Archive with 1 entries (1 files):
- catalysts-1796519-supplementary.pdf
