# Supplementary material for: Ni-H-Beta Catalysts for Ethylene Oligomerization: Impact of Parent Cation on Ni Loading, Speciation, and Siting
Source: MDPI journal article supplement (doi:10.3390/catal12080824), 2022-07-27
Supplement: s1 [file s1 › catalysts-1796519-supplementary.pdf]

**Supplementary Information for**  
**Ni-H-Beta Catalysts for Ethylene Oligomerization: Impact of Parent**  
**Cation on Ni Loading, Speciation, and Siting**

Joseph McCaig and H. Henry Lamb  
Chemical and Biomolecular Engineering  
North Carolina State University  
Raleigh, NC 27695

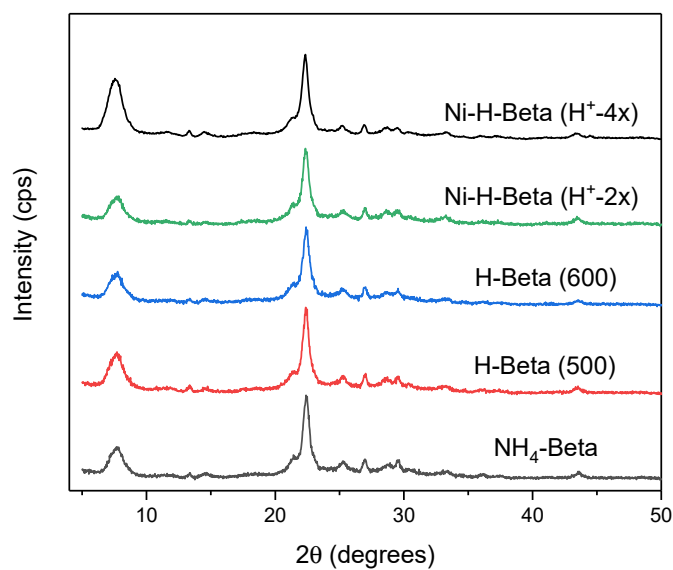

**Figure S1:** X-ray diffraction (XRD) powder patterns of the parent zeolites and selected Ni-H-Beta (H<sup>+</sup>-*nx*) catalysts.

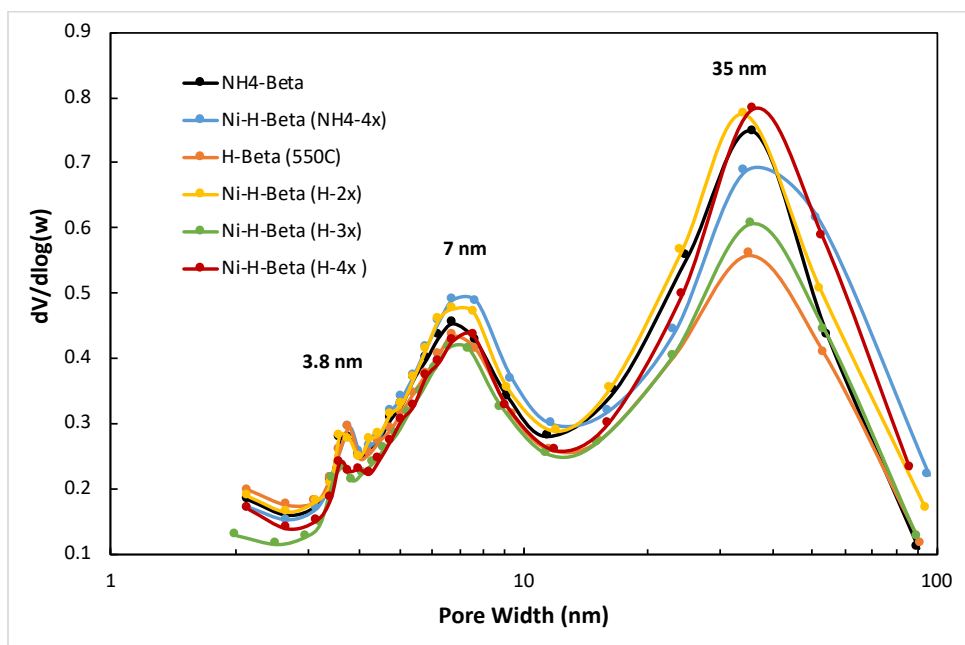

**Figure S2:** Pore size distributions of parent zeolites and Ni-H-Beta catalysts calculated from 77K N<sub>2</sub> desorption data using the BJH method.

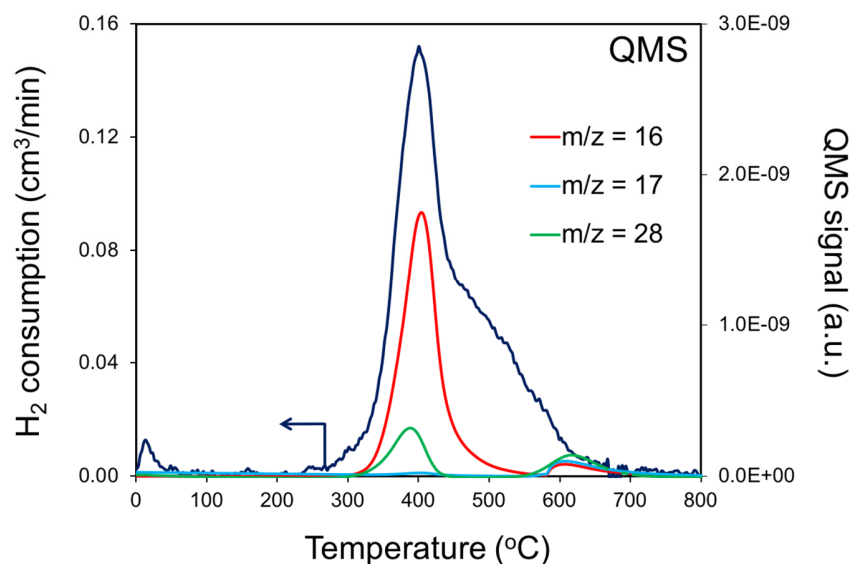

**Figure S3:** H<sub>2</sub> TPR of Ni-NH<sub>4</sub>-Beta following pretreatment at 300°C in He monitored by TCD and QMS (secondary axis). H<sub>2</sub> consumption (TCD) and QMS signals of CH<sub>4</sub> (m/z = 16), NH<sub>3</sub> (m/z = 17), and N<sub>2</sub> (m/z = 28) are shown.

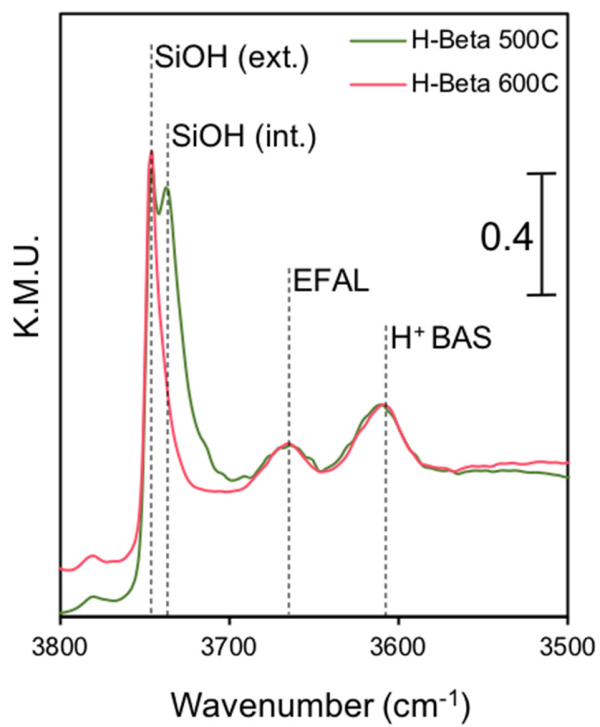

**Figure S4:**  $\nu(\text{OH})$  DRIFT spectra of H-Beta produced by calcination of  $\text{NH}_4$ -Beta at 500 and 600°C in flowing air. Samples were pretreated *in situ* at 350°C in the DRIFTS cell.

**Table S1:** CO DRIFTS peak proportions for Ni-Beta catalysts. Deconvolutions performed on commercial ORIGIN software.

| Sample                           | CO DRIFTS peak fractions |                       | CO DRIFTS peak areas (KMU/cm) |                       |
|----------------------------------|--------------------------|-----------------------|-------------------------------|-----------------------|
|                                  | 2211 $\text{cm}^{-1}$    | 2203 $\text{cm}^{-1}$ | 2211 $\text{cm}^{-1}$         | 2203 $\text{cm}^{-1}$ |
| Ni-H-Beta ( $\text{H}^+$ -4x)    | 0.72                     | 0.28                  | 13.3                          | 5.2                   |
| Ni-H-Beta ( $\text{NH}_4^+$ -4x) | 0.73                     | 0.27                  | 13.5                          | 4.9                   |
| Ni- $\text{NH}_4$ -Beta          | 0.59                     | 0.41                  | 5.5                           | 3.9                   |
| Ni-H-Beta ( $\text{Na}^+$ -4x)   | 0.68                     | 0.32                  | 20.8                          | 9.9                   |
| Ni-H-Beta ( $\text{Na}^+$ -1x)   | 0.71                     | 0.29                  | 18.9                          | 7.7                   |

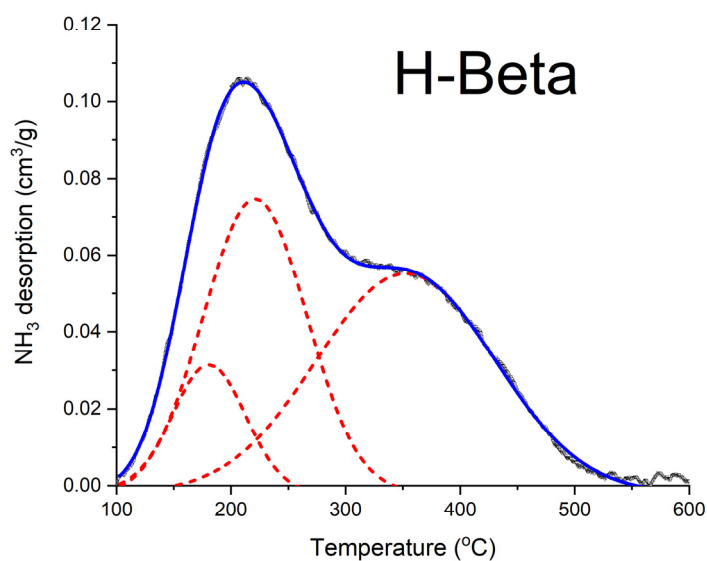

**Figure S5:** NH<sub>3</sub> TPD of H-Beta following pretreatment at 500°C in He. Peak deconvolutions performed on ORIGIN software.

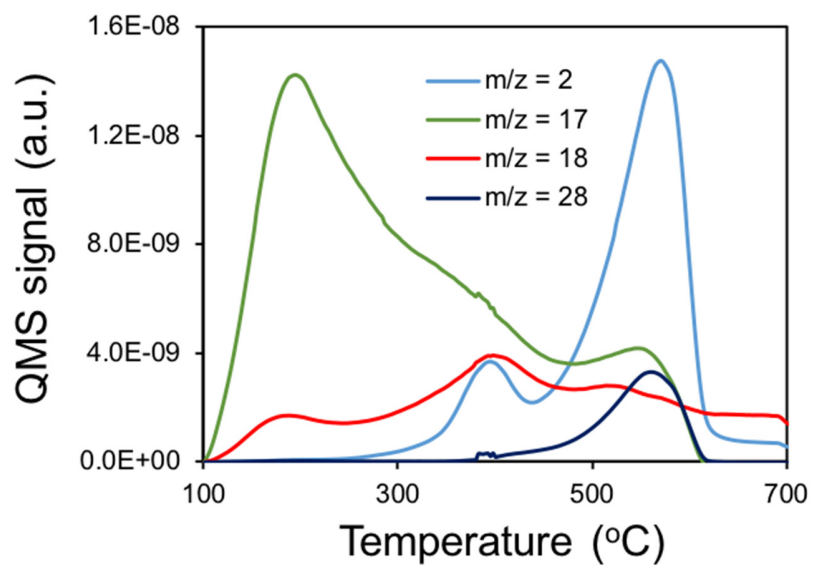

**Figure S6:** NH<sub>3</sub> TPD of Ni-NH<sub>4</sub>-Beta following pretreatment at 300°C in He monitored by on-line QMS.

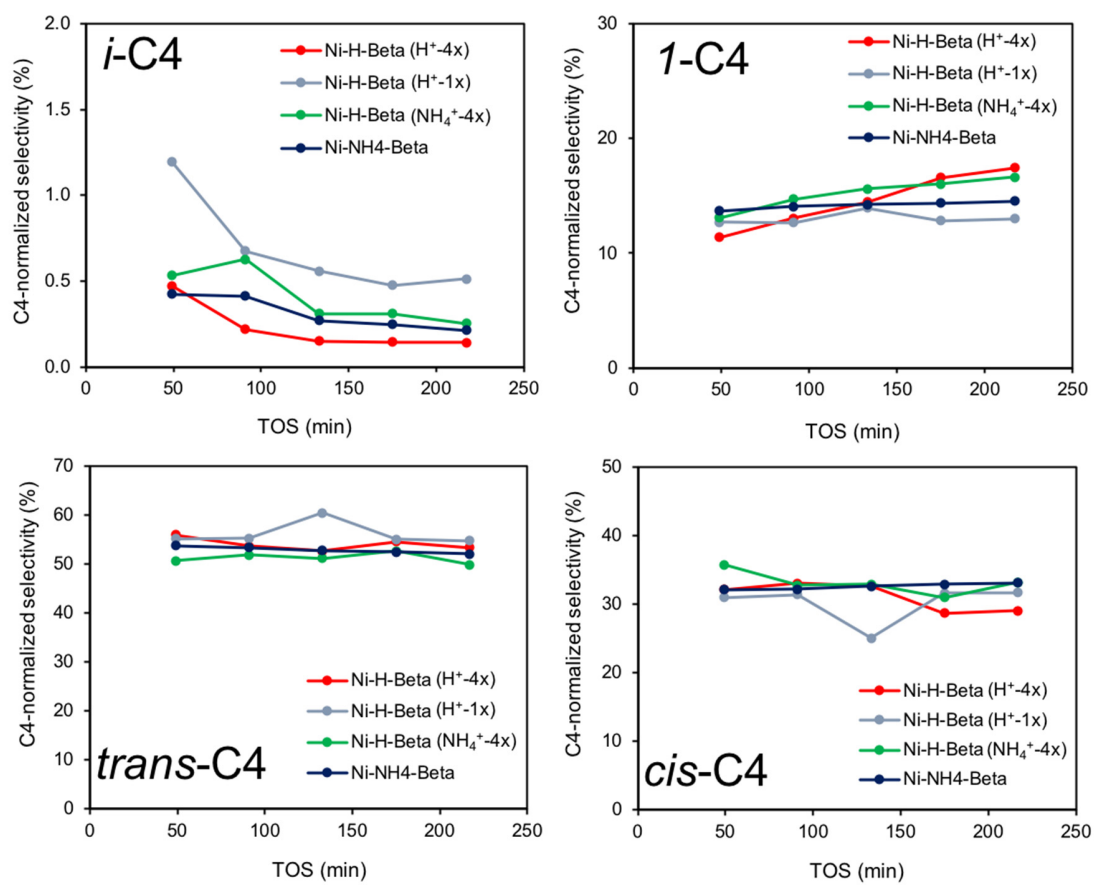

**Figure S7:** EO butene selectivities for Ni-Beta catalysts following activation at 300°C in N<sub>2</sub>. T = 225°C, P = 11 bar, WHSV = 3 h<sup>-1</sup>.
